# Supplementary material for: Anchor extension: a structure-guided approach to design cyclic peptides targeting enzyme active sites
Source: PubMed Central journal article supplement (PMC8185074; doi:10.1038/s41467-021-23609-8), 2021-06-07
Supplement: 41467_2021_23609_MOESM1_ESM.pdf [file 41467_2021_23609_MOESM1_ESM.pdf]

# Anchor extension: a structure-guided approach to design cyclic peptides targeting enzyme active sites

Parisa Hosseinzadeh<sup>1,&</sup>, Paris R. Watson<sup>2,†</sup>, Timothy W. Craven<sup>1,†</sup>, Xinting Li<sup>1,†</sup>, Stephen Rettie<sup>1,3,†</sup>, Fátima Pardo-Avila<sup>4</sup>, Asim K. Bera<sup>1</sup>, Vikram Khipple Mulligan<sup>1,\$</sup>, Peilong Lu<sup>1,#</sup>, Alexander S. Ford<sup>1</sup>, Brian D. Weitzner<sup>1,¥</sup>, Lance J. Stewart<sup>1</sup>, Adam P. Moyer<sup>1,5</sup>, Maddalena Di Piazza<sup>1</sup>, Joshua G. Whalen<sup>1</sup>, Per Jr. Greisen<sup>1,‡</sup>, David W. Christianson<sup>2</sup>, David Baker<sup>1,\*</sup>

1. University of Washington, Department of Biochemistry, Institute for Protein Design, Seattle, WA 98195, USA

2. Roy and Diana Vagelos Laboratories, Department of Chemistry, University of Pennsylvania, Philadelphia, PA 19104-6323 USA

3. Molecular and Cellular Biology Ph.D. Program, University of Washington, Seattle, WA 98195, USA

4. Department of Structural Biology, Stanford University School of Medicine, Stanford, CA 94305, USA

5. Molecular Engineering Ph.D. Program, University of Washington, Seattle, WA 98195, USA

† These authors contributed equally to this manuscript.

\* Correspondence are directed to [dabaker@uw.edu](mailto:dabaker@uw.edu)

## Supplementary Figures

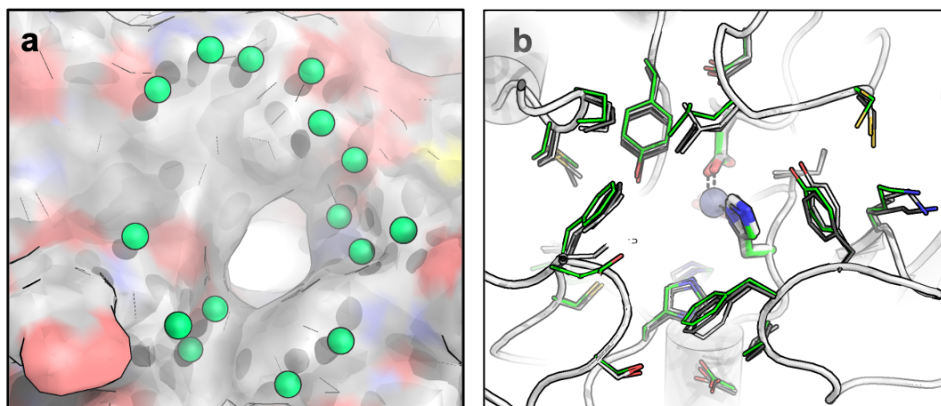

**Supplementary Figure 1. Structural analysis of HDAC2 points to the challenges for designing selective and high affinity HDAC2 inhibitors.** (a) Surface representation of HDAC2 binding pocket shows multiple polar atoms (pink = O, blue = N, yellow= S), as well as water molecules (green spheres). (b) Overlay of crystal structures of HDACs 1,2,3 (PDB IDs: 5ICN, 5IWG, 4A69 respectively) shows near identical structure and sequence at the binding pocket.

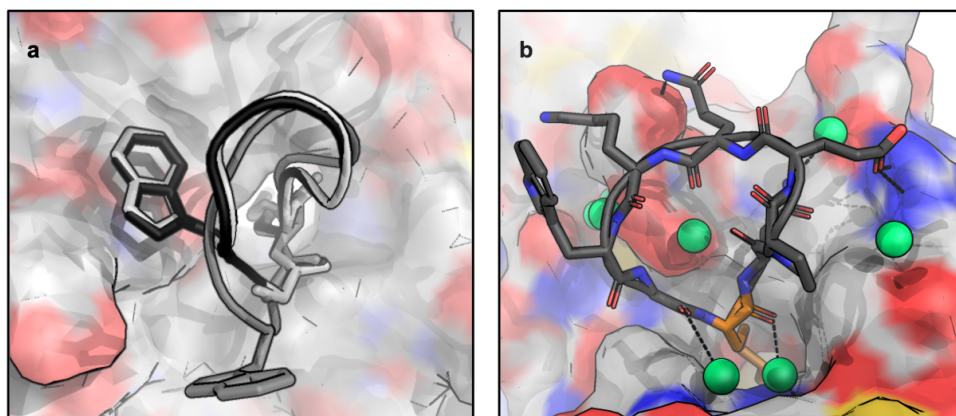

**Supplementary Figure 2. Crystal structure of des1.1.0 shows two binding orientations.** (a) Overlay of three chains in asymmetric crystallographic unit of des1.1.0 shows two distinct conformations. (b) des1.1.1 (Lys→Glu) stabilizes the least populated binding mode in all three chains, as designed.

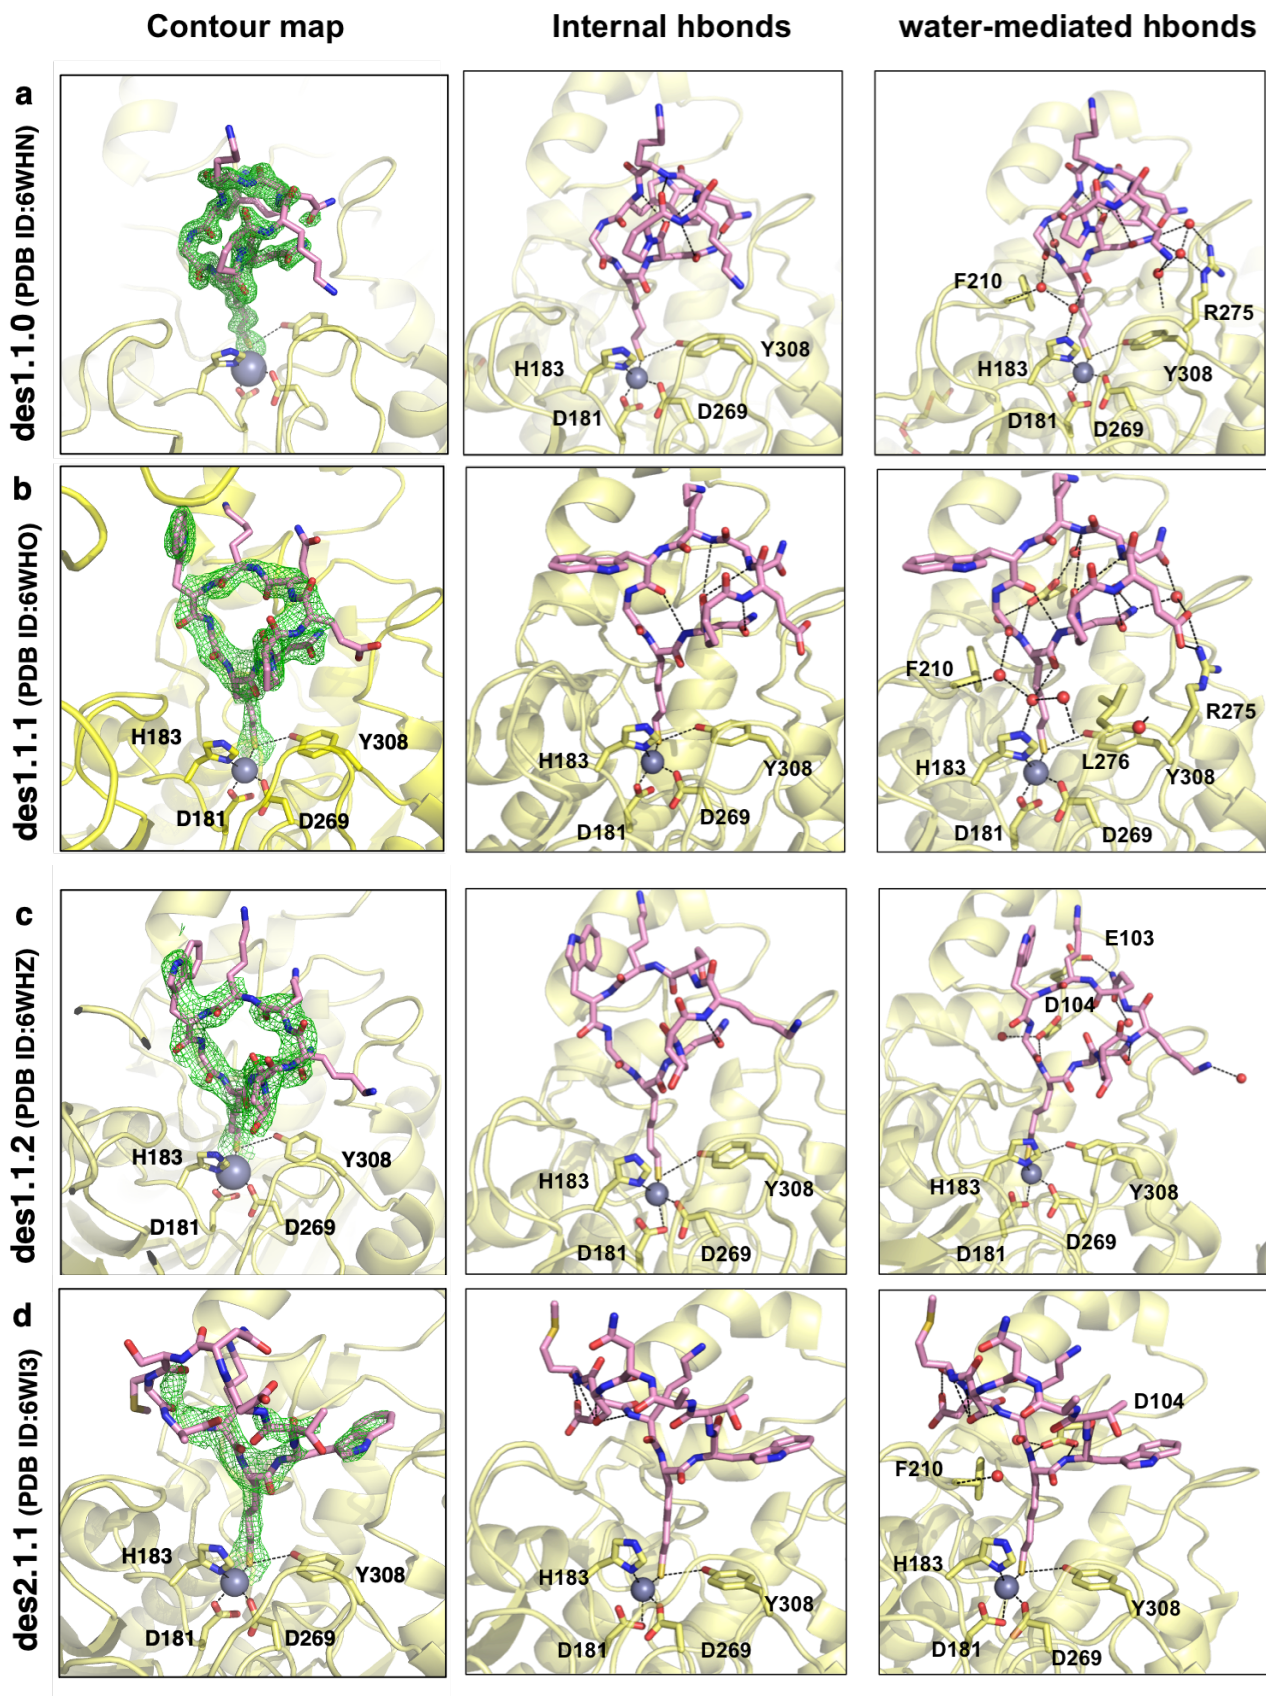



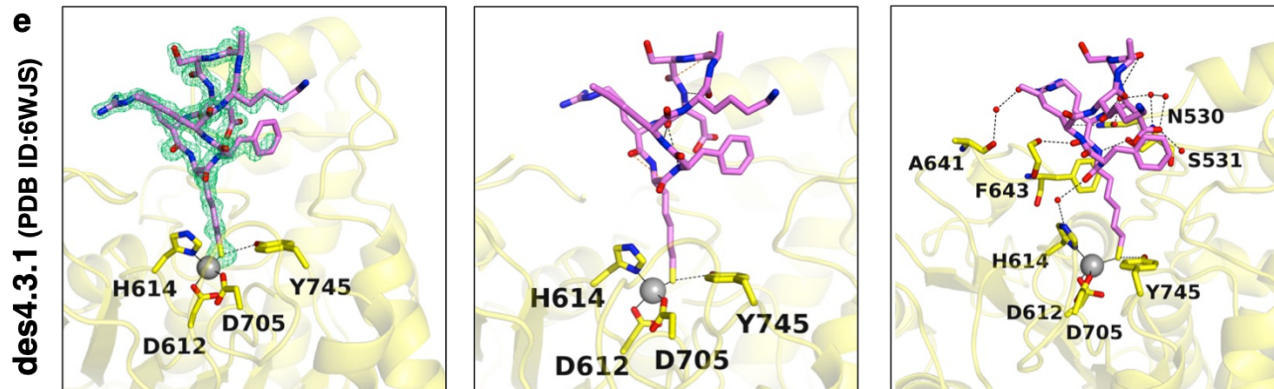

**Supplementary Figure 3. Crystal structure of different HDAC variants and their interactions with the protein.** Details of crystal structures of different designed macrocycles: (a) des1.1.0, (b) des1.1.1, (c) des1.1.2, (d) des2.1.1, and (e) des4.3.1. Polder omit map are contoured at  $3.0\sigma$  for all the designs but Des4.3.1 ( $4.0\sigma$ ) showing the binding of the peptides in the active site of HDAC2 (HDAC6 for des4.3.1). Incomplete electron density in some residues of the peptide suggests some measure of conformational disorder for these inhibitor residues. The catalytic  $Zn^{2+}$  ion (grey sphere) is coordinated in tetrahedral fashion by three protein residues (two Asp and one His) and the thiolate side chain of SHA, which also forms a hydrogen bond with a Tyr near the active site. Metal coordination and hydrogen bond interactions are shown as dashed black lines. Water molecules are shown as red spheres. Chains B, A, A, and A were used due to lower B-factor for des1.1.0, 1.1.1, 1.1.2, and 2.1.1 respectively.

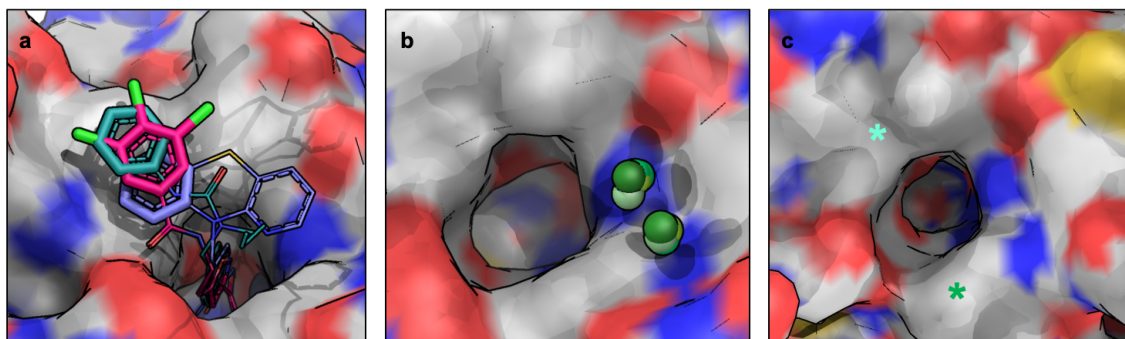

**Supplementary Figure 4. Structural analysis of HDAC structures suggests new design directions for enhanced binding.** (a) An aromatic ring is observed in a conserved position in many of HDAC binders (purple: PDB ID 5W5K, green: PDB ID 5G0I, pink: PDB ID 6R0K). (b) Conserved water molecules at the binding pocket of HDAC2 (from PDB IDs 5IWG, 4LY1, 6GO3). (c) The two asterisks show the hydrophobic patches immediately adjacent to the active site pocket of HDAC2.

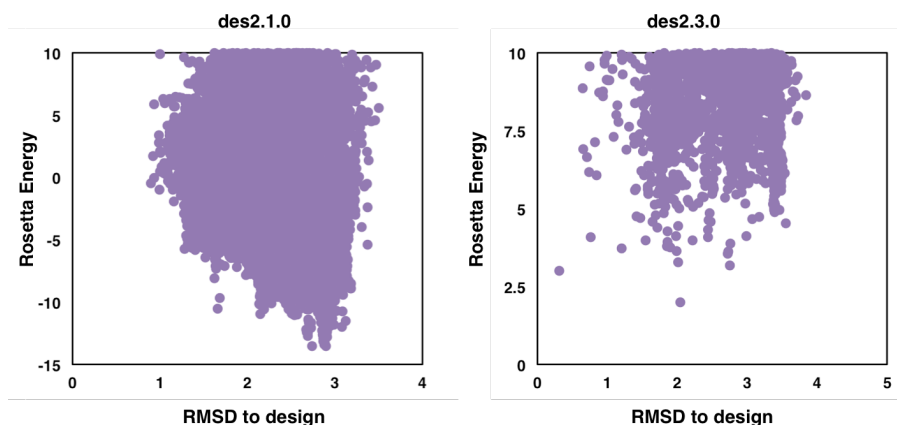

**Supplementary Figure 5. Computational conformational sampling of designs from method 2 suggests peptide flexibility.** Representative computational conformational sampling of two designs from design method 2. Source Data are provided as a Source Data file.



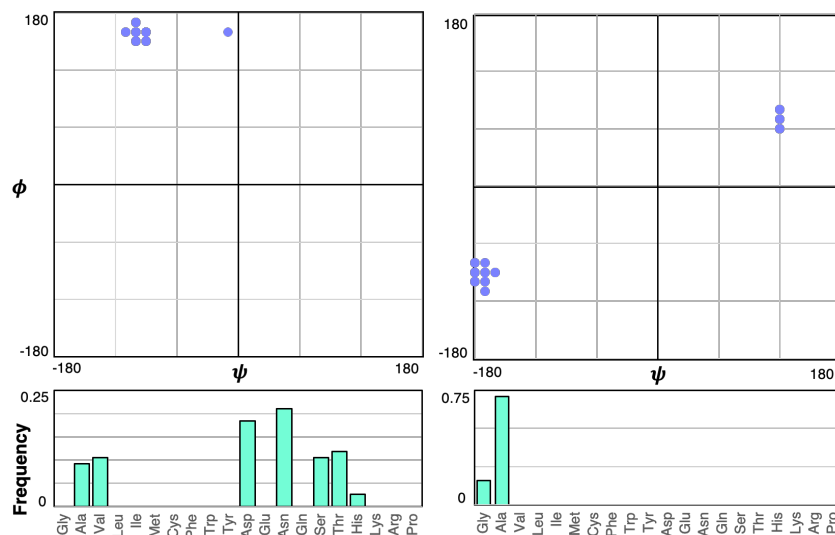

**Supplementary Figure 6. Exhaustive sampling of residues around SHA anchor in design method 3 converge to few torsions and amino acids.** Torsion and amino acid distribution of the top selected sampled peptides from method 3 for residue right before SHA (left) and the one right after SHA (right).

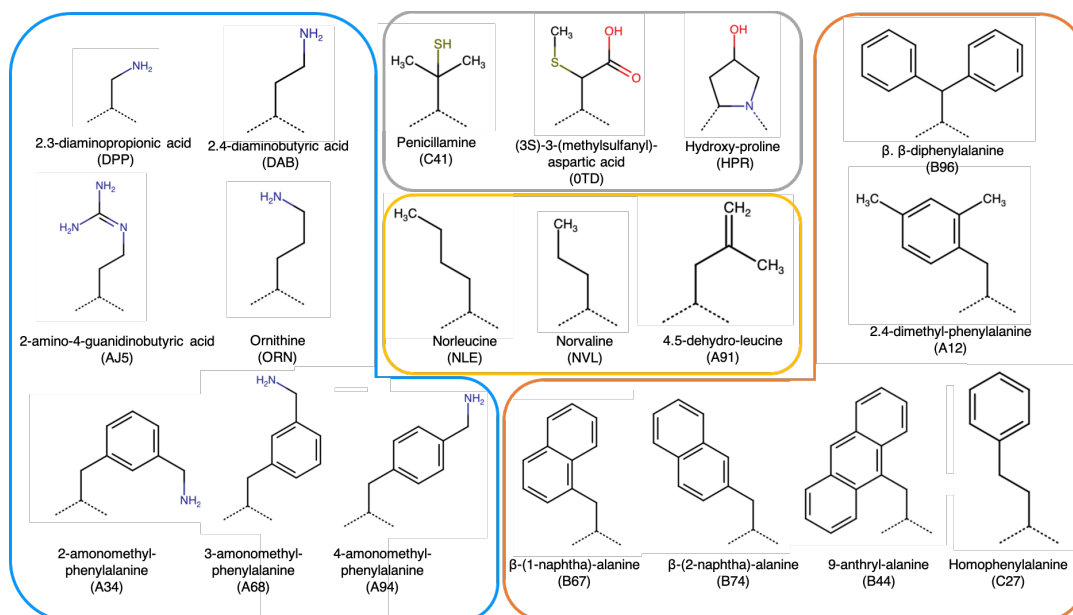

**Supplementary Figure 7. Noncanonical amino acids used in our design.** Chemical structure, name, and Rosetta 3 letter code of the noncanonical amino acids used in design method 4. The amino acids are grouped based on the properties of their sidechain into 4 groups: positively charged (blue), small hydrophobic (yellow), aromatic (orange), and others (grey).

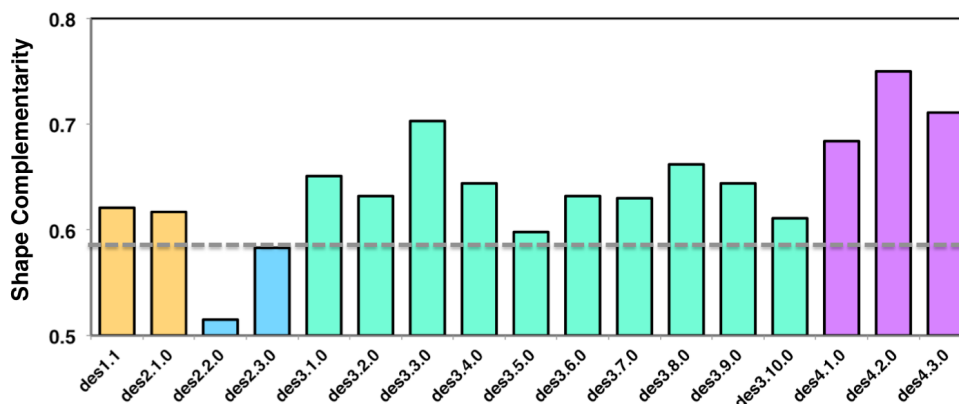

**Supplementary Figure 8. Design methods 3 and 4 overall show higher shape complementarity between the peptide and protein pocket.** Comparison of the selected designs from methods 1-4 for shape complementarity, an in silico binding metrics

representative of how well the macrocycle matches the binding interface in terms of shape. The dashed line shows the average value for method 1 and 2. Macrocycles designed using method3 and 4 in general showed better shape complementarity value; this better overall performance reflects in the macrocycles selected to test as well -shown in this figure-

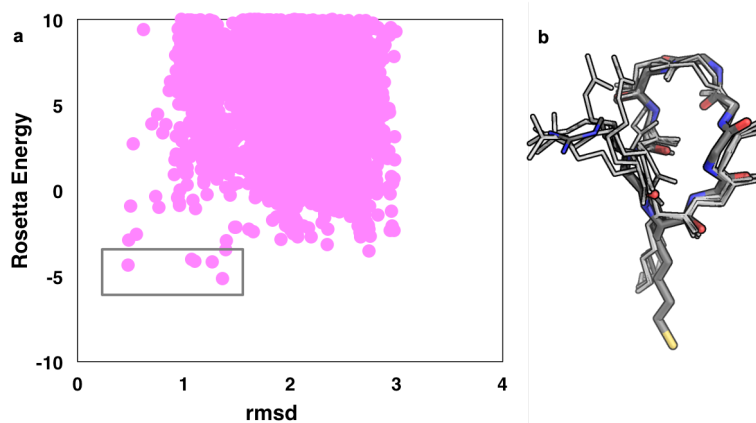

**Supplementary Figure 9. Conformational sampling of D-Arg→ L-Arg mutation in des4.3.1.** (a) Conformational sampling of des431: D-Arg→ L-Arg shows that Rosetta can capture the observed conformation in the crystal structure. (b) The peptide structure from crystal structure (PDB ID: 6WSJ, dark grey sticks) is overlaid with top 5 best scoring structures shown as light grey lines.

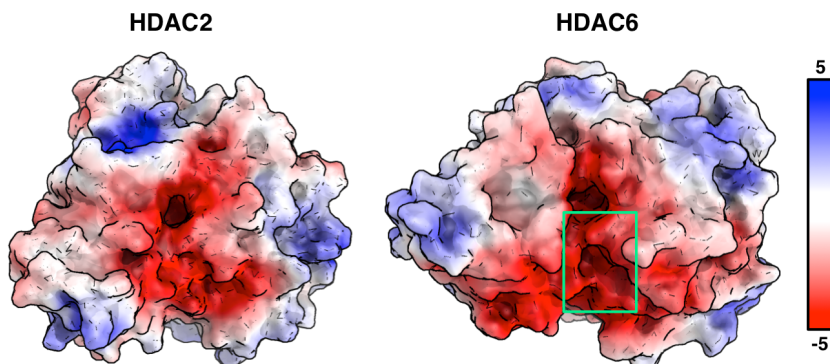

**Supplementary Figure 10. HDAC2 and HDAC6 have different electrostatic surface potential.** Electrostatic surface potential of HDAC2 and HDAC6 contoured at 1/-1 kT/e. The green box shows the relative position of des4.3.1 D-Arg-4 interaction with HDAC6.

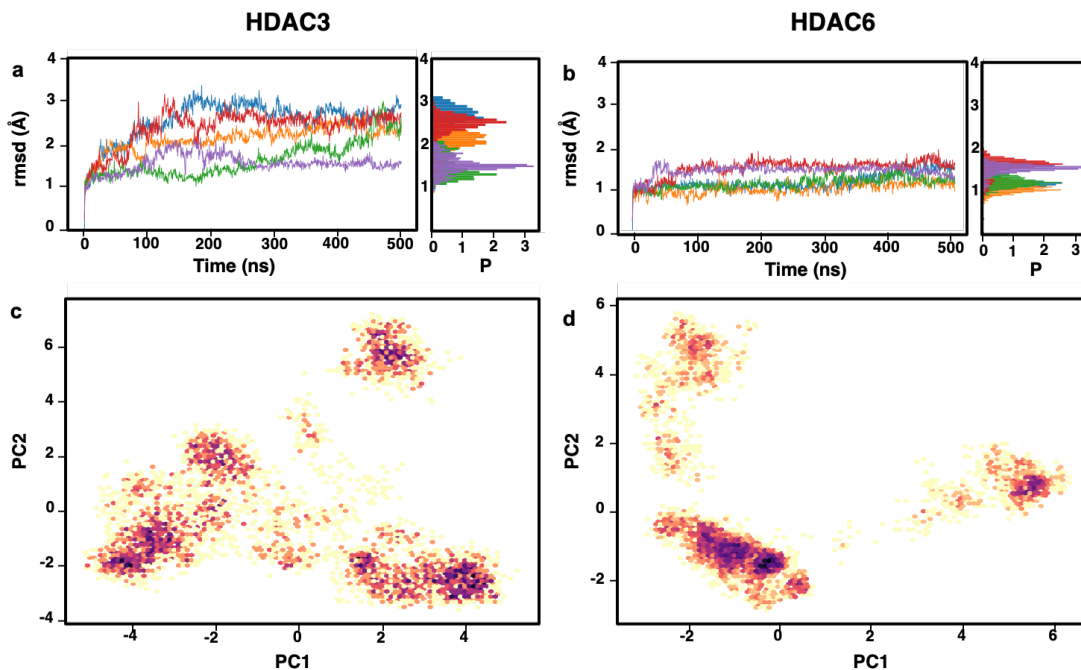

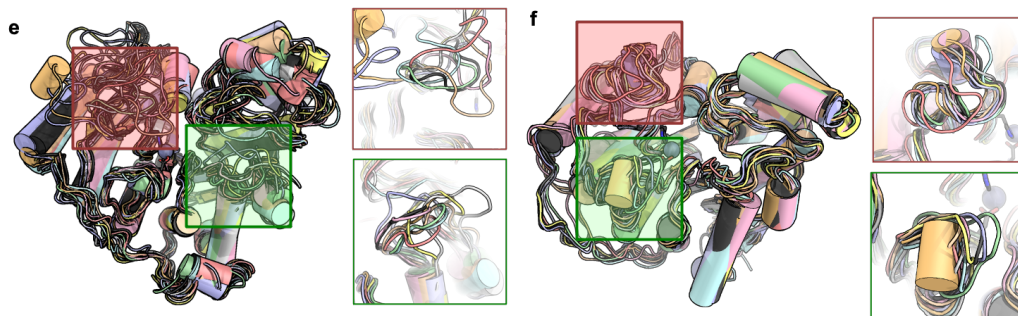

**Supplementary Figure 11. MD simulations display structural flexibility in different HDACs.** Panels a, b show RMSD to the starting conformation of the MD trajectories (5x100ns) for HDAC3 and HDAC6. The RMSD traces (left panels) and histograms (right panels) are shown for each trajectory with corresponding colors. Panels c and d show 2D histograms of the combined MD trajectories projected onto the first two principal components calculated from the phi and psi dihedral angles. Panels e and f show overlay of representative members of different conformational clusters observed during simulation.

### des1.1.0

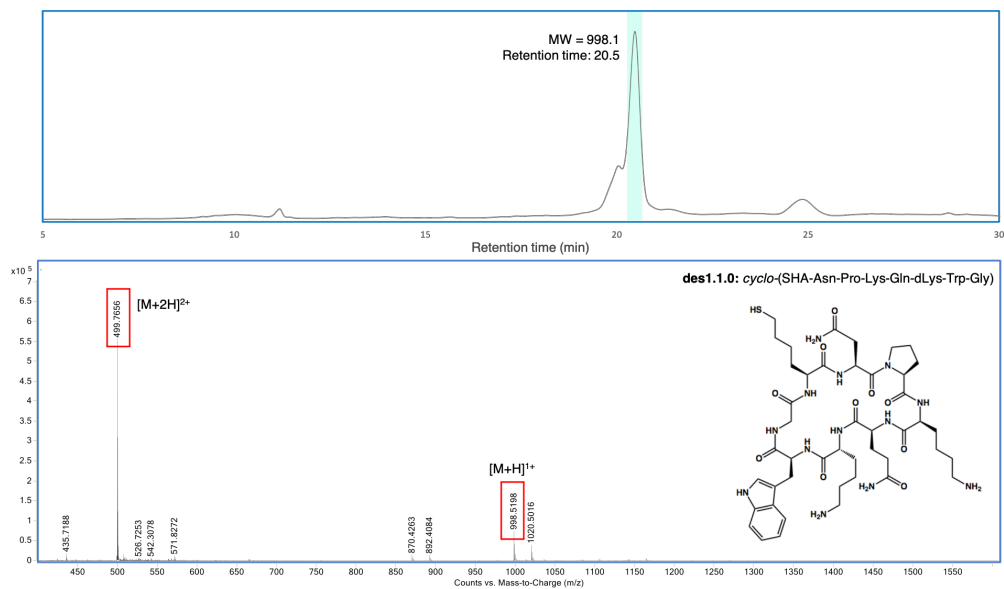

### des1.1.1

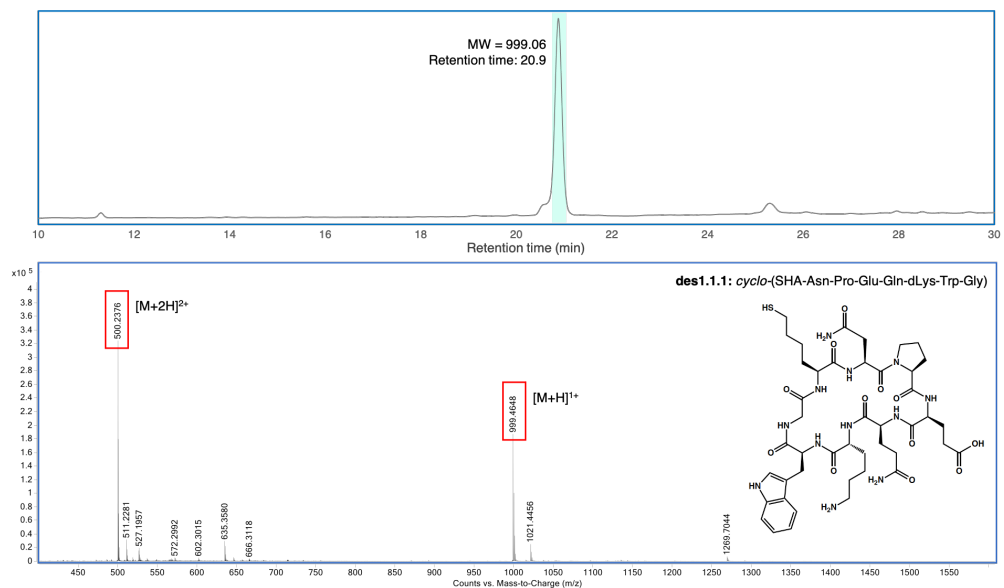

### des1.1.2



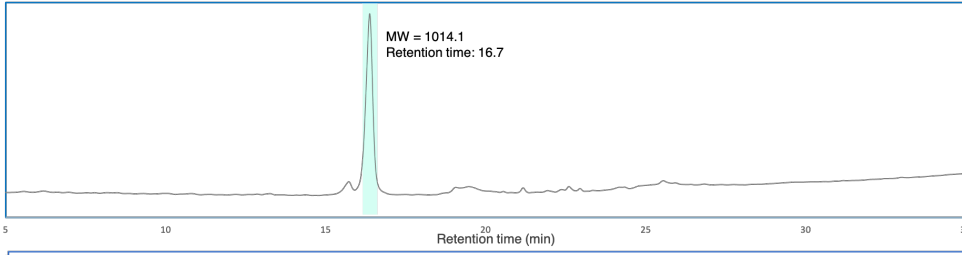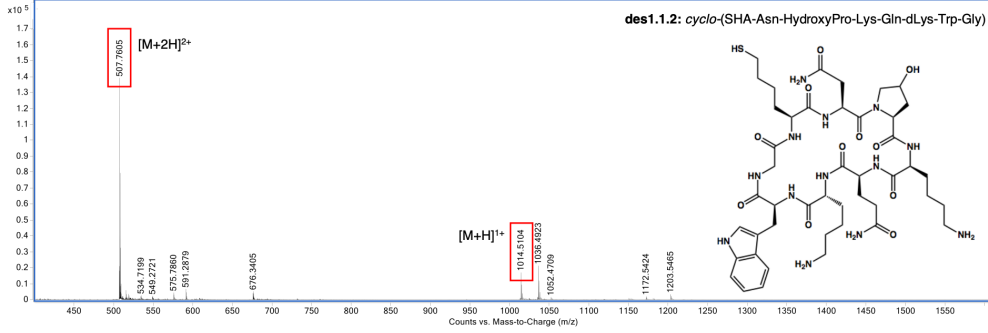

**des2.1.0**

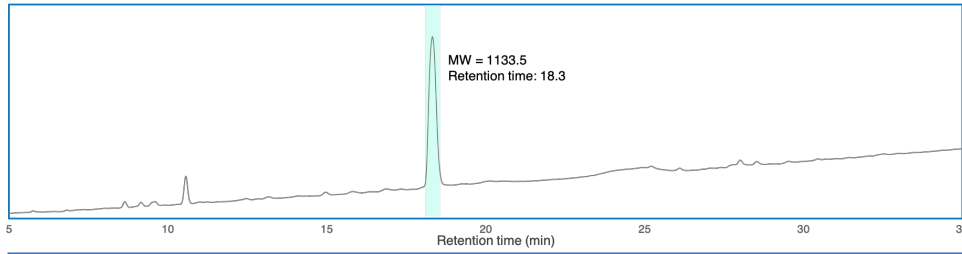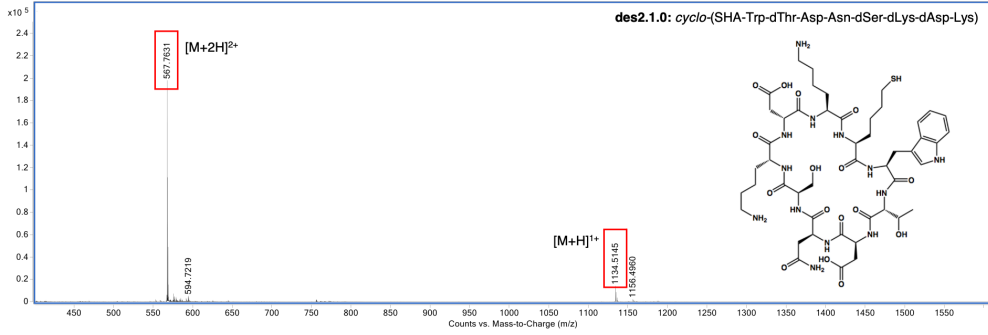

**des2.1.1**

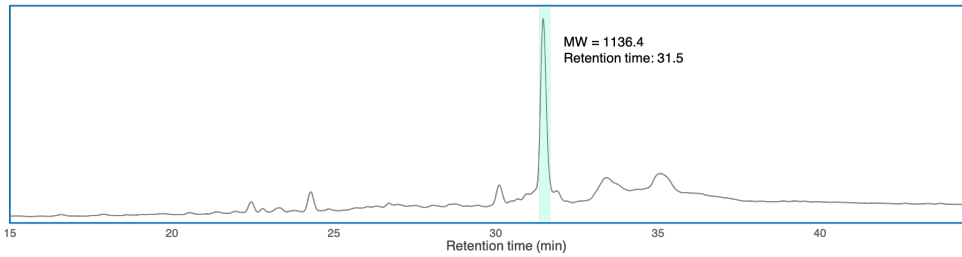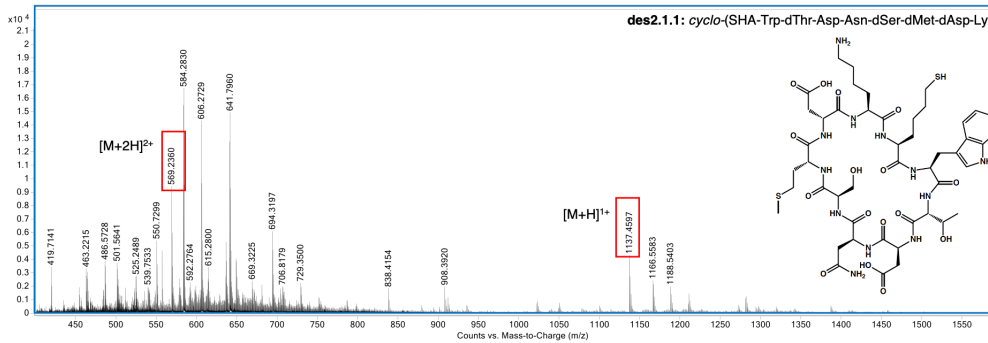

**des2.2.0**

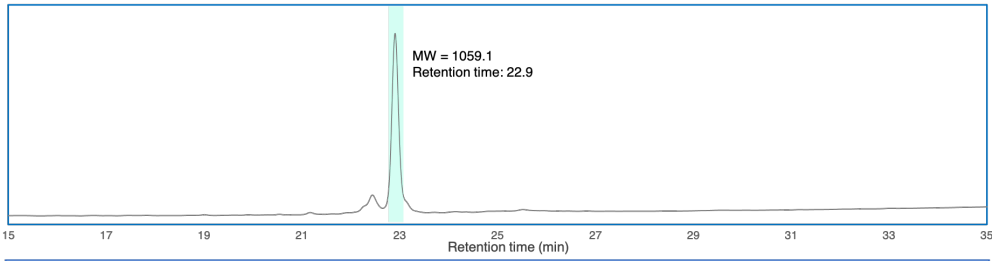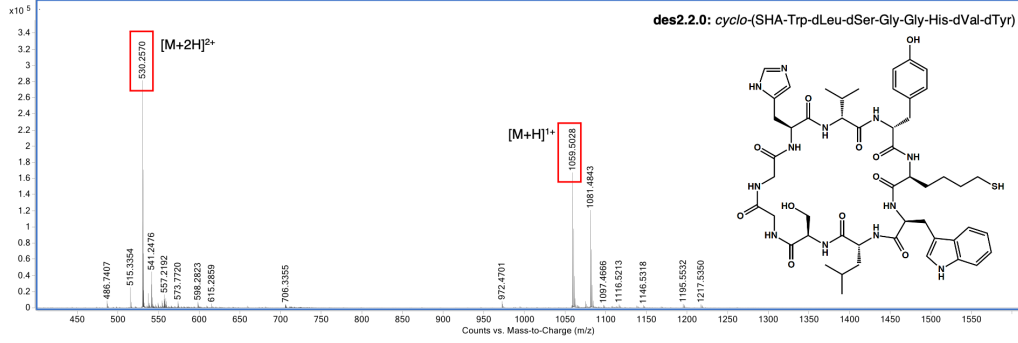

**des3.1.0**

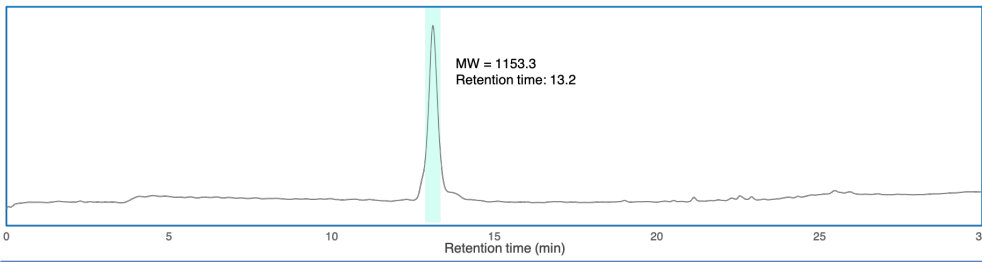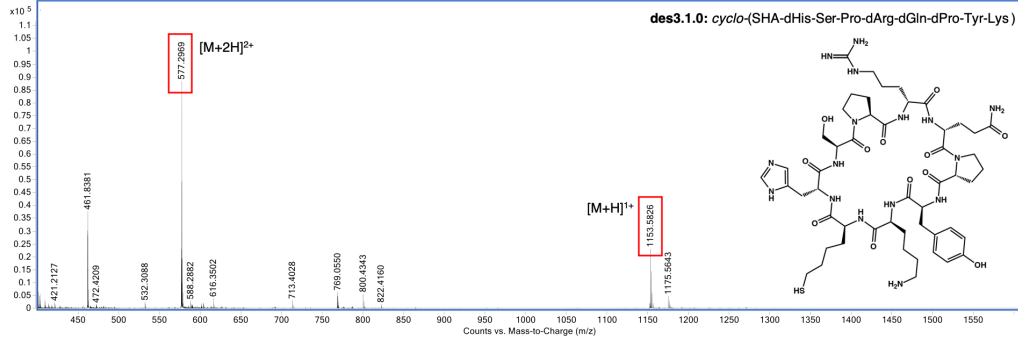

**des3.2.0**

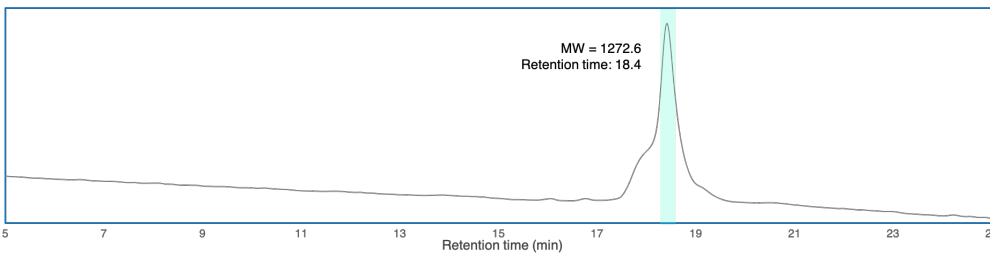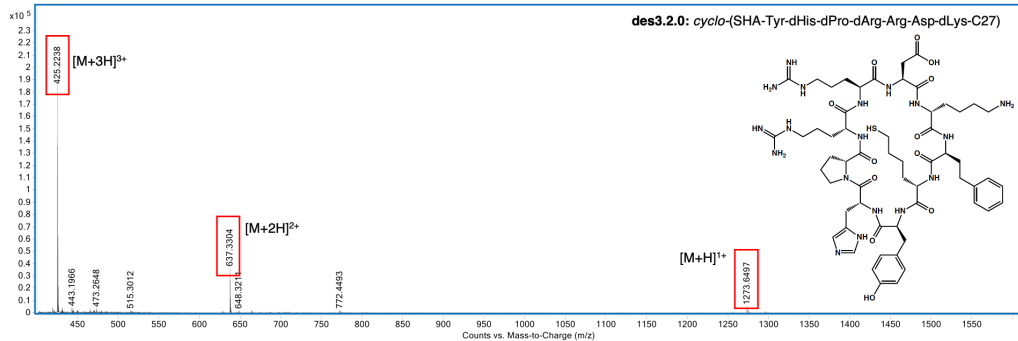

**des3.2.1**

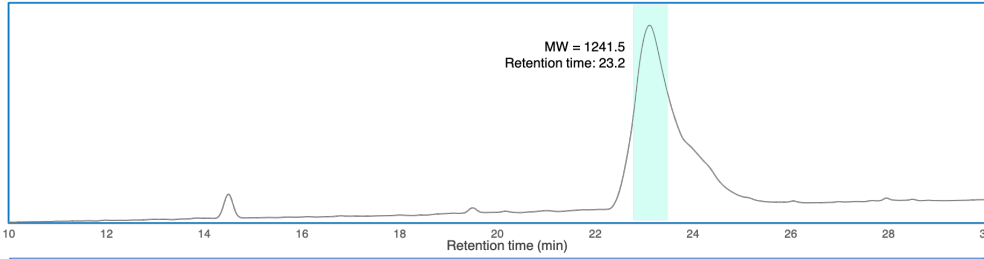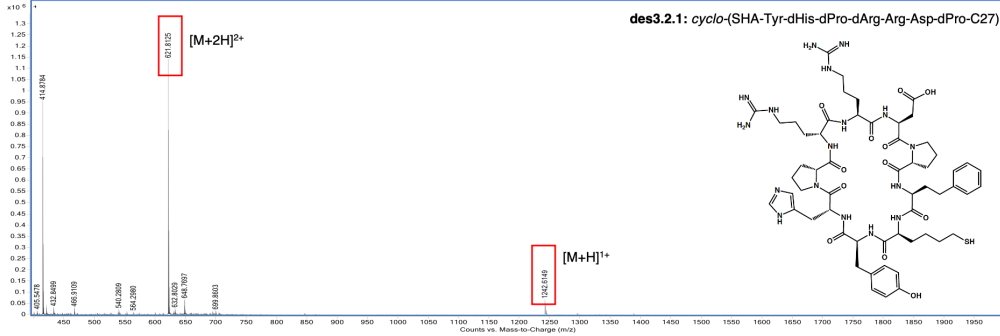

**des3.3.0**

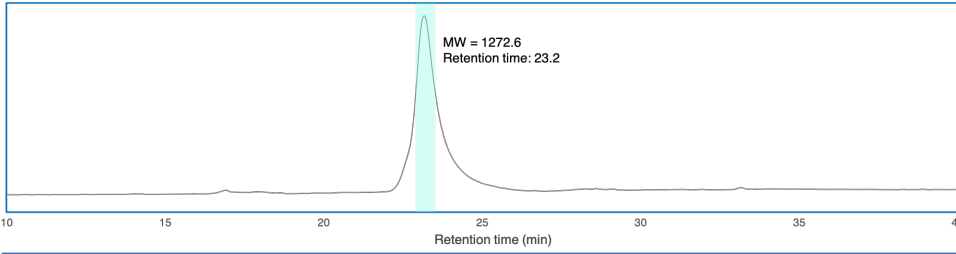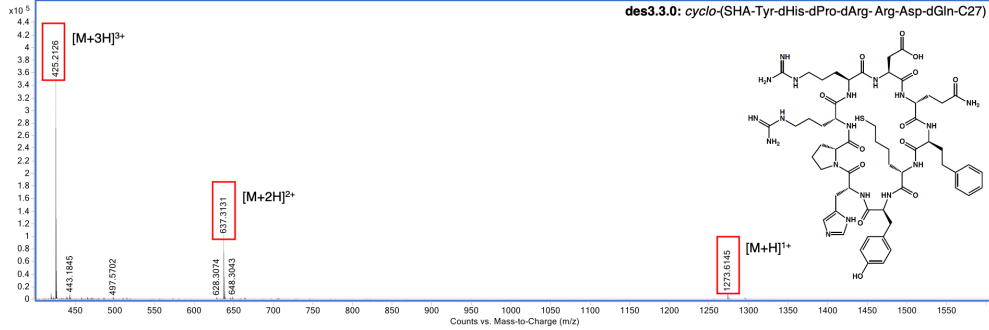

**des3.3.1**

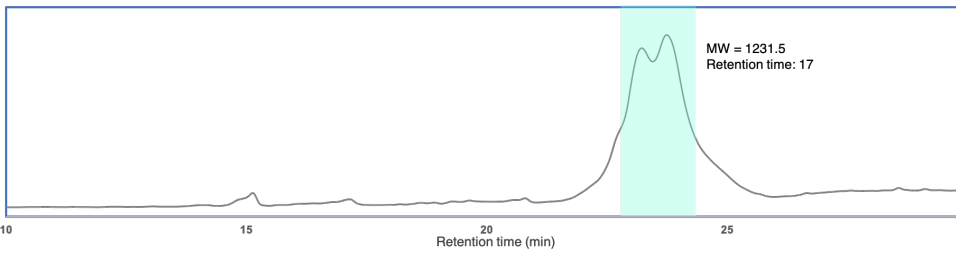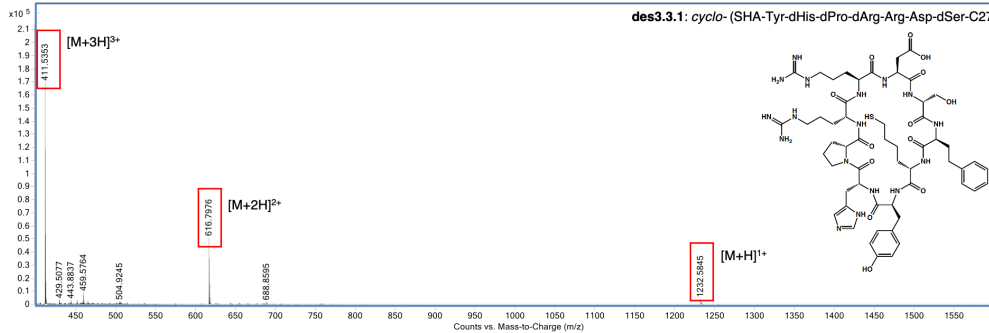

**des3.3.2**



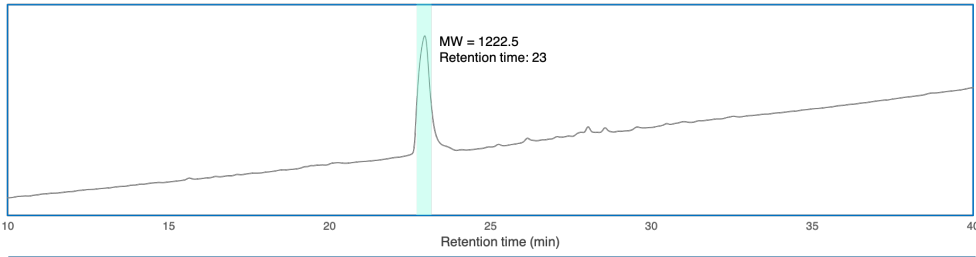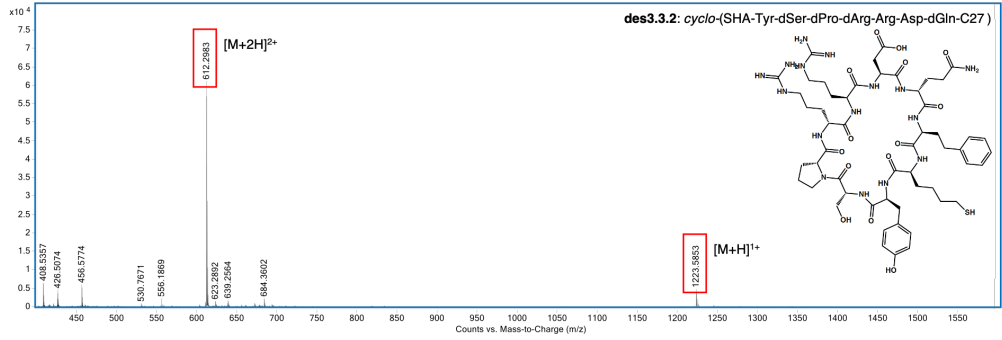

**des4.1.0**

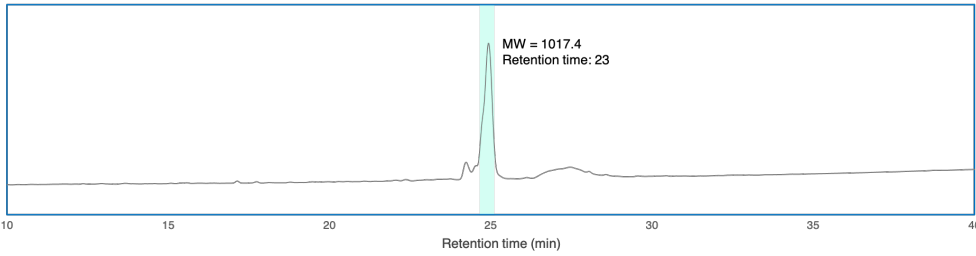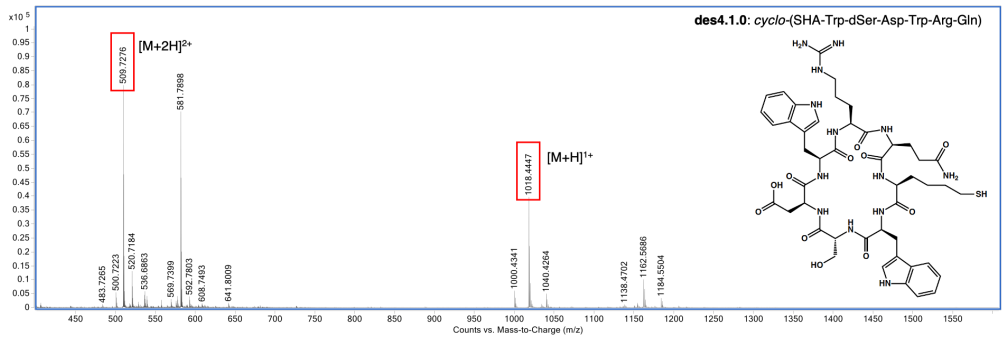

**des4.2.0**

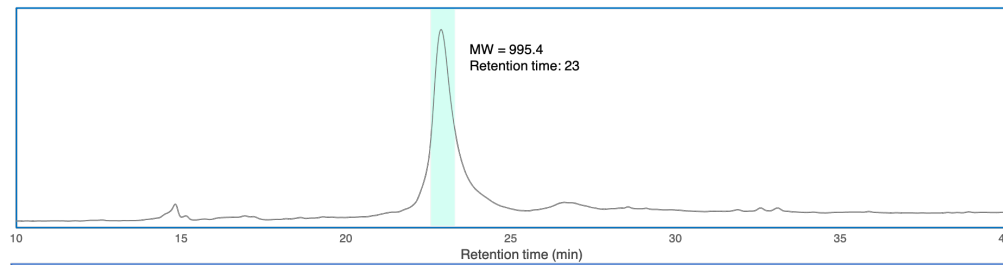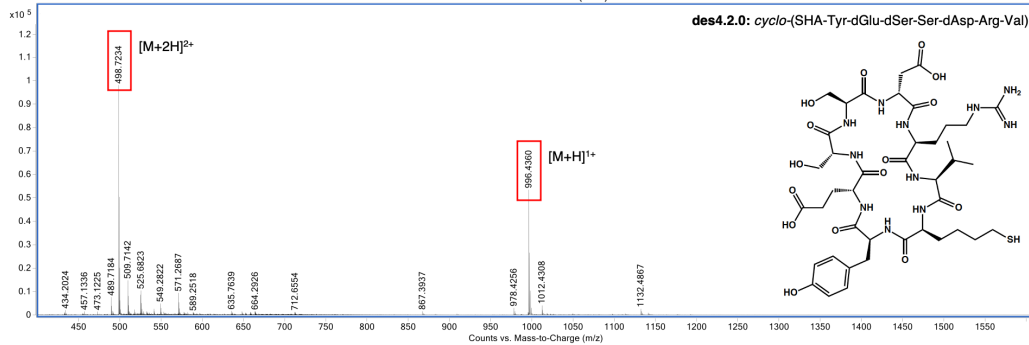

**des4.3.1**

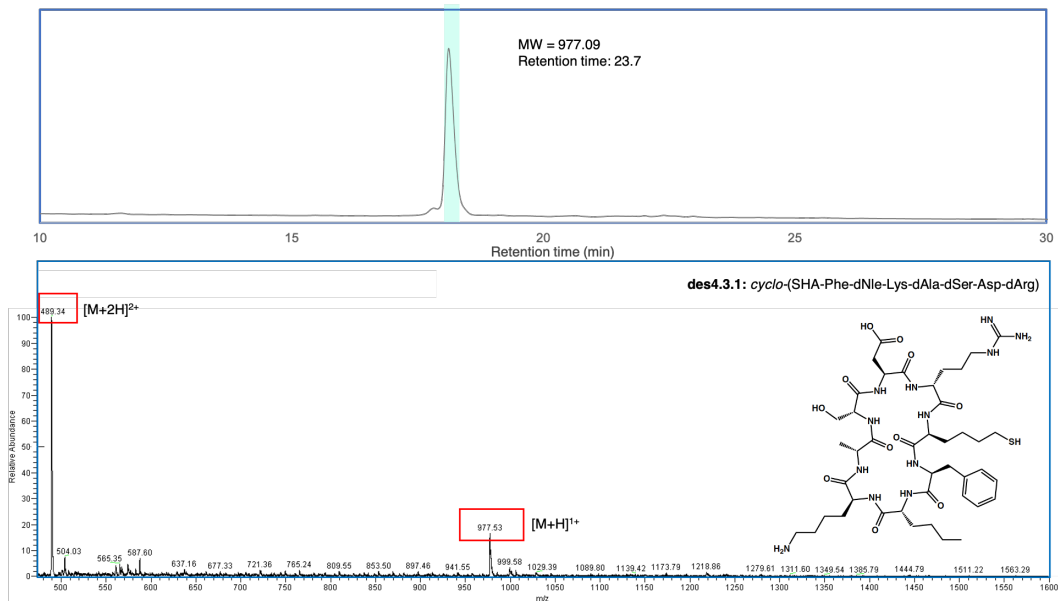

**Supplementary Figure 12. LD-MS data of peptides used in HDAC inhibition assay.** All runs were from 5-95% at 2%/min, with A = H<sub>2</sub>O w/ .1% TFA, and B = 90% ACN/10% H<sub>2</sub>O w/ .1% TFA. The spectra were collected at 220nm. The green shades are the fraction that was collected. Source data are provided in Source Data file.

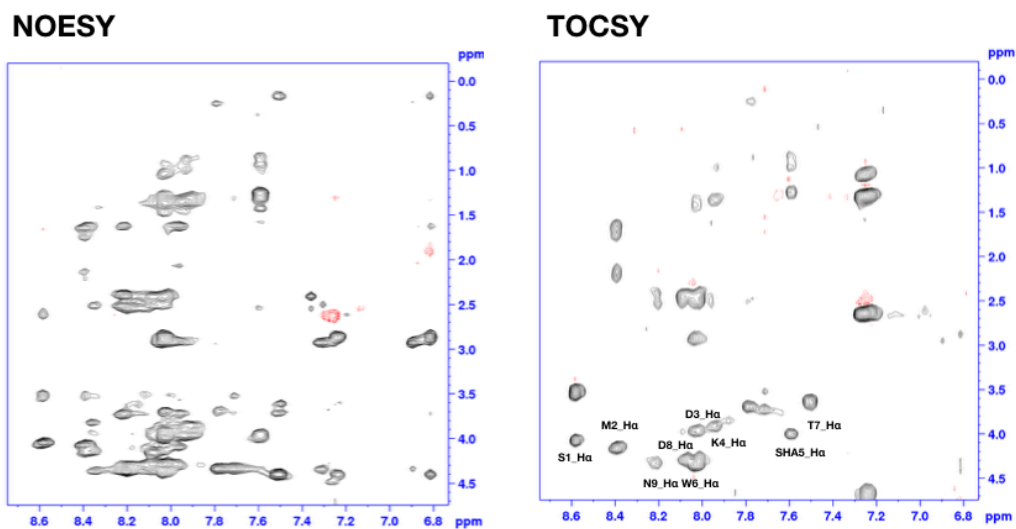

**Supplementary Figure 13. NOESY and TOCSY NMR spectra of design2.1.1.** Important atoms are labeled.

## Supplementary Tables

**Supplementary Table 1. Binding affinity of some of most potent peptide-based and peptide-like HDAC inhibitors.**  
All values are IC<sub>50</sub> [nM], except for Apicidin for which EC<sub>50</sub> was reported. Orange cells are those with highest potency.

| Name                          | Type and reference                                      | Class I            |                  |         |         | Class IIa         | Class IIb       |
|-------------------------------|---------------------------------------------------------|--------------------|------------------|---------|---------|-------------------|-----------------|
|                               |                                                         | HDAC1              | HDAC2            | HDAC3   | HDAC8   | HDAC4             | HDAC6           |
| Cyl-2                         | tetrapeptide with ncAA, covalent inhibitor <sup>1</sup> | 0.70 ± 0.45        |                  |         |         | NA                | 40,000 ± 11,000 |
| Trapoxin B                    | tetrapeptide with ncAA, covalent inhibitor <sup>1</sup> | <b>0.11 ± 0.01</b> |                  |         |         | <b>0.3 ± 0.03</b> | 360 ± 160       |
| Apicidin 39 (highest potency) | Tetrapeptide with ncAA <sup>2</sup>                     |                    | 120              | 43      | 575     |                   |                 |
| Romidepsin                    | Depsipeptide, activated upon reduction <sup>3</sup>     | 1.6 ± 0.9          | <b>3.9 ± 2.7</b> |         |         | 25 ± 7.3          | 790 ± 110       |
| 4a (HDAC1 selective)          | α3β peptide from library <sup>4</sup>                   | 20                 |                  | 62 ± 7  | 4920    |                   | >10,000         |
| 3c (Highest potency)          | α3β peptide from library <sup>4</sup>                   | 2 ± 1.4            |                  | 18 ± 3  | 133     |                   | 31 ± 2          |
| 23 (HDAC6 selective)          | α3β peptide from library <sup>4</sup>                   | 122 ± 15           |                  | 164 ± 4 | 244 ± 9 |                   | 39 ± 3          |
| des3.3.0                      | Computational design (this study)                       | 4.2                | 9.1              | 6.4     | 244     |                   | 11.6            |
| des4.2.0                      | Computational design (this study)                       | 58.2               | 214              | 71.2    | 370     |                   | <b>4.4</b>      |

**Supplementary Table 2. IC<sub>50</sub> values of selected macrocyclic designs against HDACs 1,2,3,6,8.** FF column indicates how likely these peptides are to fold into the designed model based on Rosetta's conformational sampling. Darker blue indicates highest probability of folding and red means not folded.

|            | HDAC1 (IC <sub>50</sub> ) | HDAC2 (IC <sub>50</sub> ) | HDAC3 (IC <sub>50</sub> ) | HDAC6 (IC <sub>50</sub> ) | HDAC8 (IC <sub>50</sub> ) | FF | Sequence                                |
|------------|---------------------------|---------------------------|---------------------------|---------------------------|---------------------------|----|-----------------------------------------|
| * des1.1.0 | 1.88E-07                  | 2.89E-07                  | 4.76E-08                  | 2.48E-08                  | 2.16E-06                  |    | SHA-Asn-Pro-Lys-Gln-dLys-Trp-Gly        |
| des1.1.1   | 1.37E-07                  | 1.92E-07                  | 1.61E-07                  | 3.24E-08                  | 1.39E-06                  |    | SHA-Asn-Pro-Glu-Gln-dLys-Trp-Gly        |
| des1.1.2   | 5.23E-07                  | 9.30E-07                  | 7.77E-08                  | 2.16E-08                  | 7.72E-06                  |    | SHA-Asn-Hpr-Lys-Gln-dLys-Trp-Gly        |
| des2.1.0   | 2.55E-08                  | 4.93E-08                  | 5.62E-08                  | 3.23E-08                  | 3.99E-07                  |    | SHA-Trp-dThr-Asp-Asn-dSer-dLys-dAsp-Lys |
| * des2.1.1 | 8.83E-09                  | 1.63E-08                  | 1.30E-08                  | 7.54E-09                  | 3.52E-07                  | *  | SHA-Trp-dThr-Asp-Asn-dSer-dMet-dAsp-Lys |
| des2.2.0   | 9.47E-06                  | 1.00E-05                  | 1.21E-05                  | 1.38E-06                  | 5.68E-06                  |    | SHA-Trp-dLeu-dSer-Gly-Gly-His-dVal-dTyr |
| des3.1.0   | 3.24E-07                  | 1.43E-06                  | 7.24E-07                  | 1.34E-06                  | 2.73E-06                  |    | SHA-dHis-Ser-Pro-dArg-dGln-dPro-Tyr-Lys |
| des3.2.0   | 9.83E-09                  | 2.78E-08                  | 9.53E-09                  | 1.46E-08                  | 1.80E-07                  |    | SHA-Tyr-dHis-dPro-dArg-Arg-Asp-dLys-C27 |
| des3.2.1   | ND                        | 6.62E-08                  | 2.68E-08                  | 2.90E-08                  | 1.20E-07                  |    | SHA-Tyr-dHis-dPro-dArg-Arg-Asp-dPro-C27 |
| des3.2.2   | ND                        | 5.29E-08                  | 2.37E-08                  | 2.23E-08                  | 2.57E-07                  |    | SHA-Tyr-dHis-dPro-dArg-Pro-Asp-dLys-C27 |
| des3.2.3   | ND                        | 4.04E-08                  | 1.92E-08                  | 1.85E-08                  | 3.56E-07                  |    | SHA-Tyr-dHis-dPro-dArg-Pro-Asp-dPro-C27 |
| des3.2.4   | ND                        | 6.77E-08                  | 9.62E-08                  | 2.87E-08                  | 1.59E-07                  |    | SHA-Tyr-dHis-dPro-dAsn-Lys-C27          |
| des3.2.5   | ND                        | 4.61E-08                  | 8.74E-08                  | 1.76E-08                  | ND                        |    | SHA-Tyr-dHis-dPro-dArg-Lys-C27          |
| des3.3.0   | 4.18E-09                  | <b>9.12E-09</b>           | 6.37E-09                  | 1.16E-08                  | 2.44E-07                  |    | SHA-Tyr-dHis-dPro-dArg-Arg-Asp-dGln-C27 |
| § des3.3.1 | 9.38E-09                  | 2.48E-08                  | 4.12E-09                  | 1.93E-08                  | 1.08E-07                  |    | SHA-Tyr-dHis-dPro-dArg-Arg-Asp-dSer-C27 |
| des3.3.2   | 4.38E-09                  | 5.70E-08                  | 1.21E-08                  | 1.97E-07                  | 2.17E-07                  |    | SHA-Tyr-dSer-dPro-dArg-Arg-Asp-dGln-C27 |
| des4.1.0   | 7.31E-08                  | 9.73E-08                  | 6.06E-08                  | 2.32E-08                  | 5.04E-07                  |    | SHA-Trp-dSer-Asp-Trp-Arg-Gln            |
| des4.2.0   | 5.82E-08                  | 2.14E-07                  | 7.12E-08                  | <b>4.42E-09</b>           | 3.70E-07                  |    | SHA-Tyr-dGlu-dSer-Ser-dAsp-Arg-Val      |
| des4.3.1   | 7.54E-07                  | 1.47E-06                  | 6.26E-07                  | 1.71E-08                  | 8.18E-08                  |    | SHA-Phe-dNle-Lys-dAla-dSer-Asp-dArg     |
| SHA        | 4.94E-06                  | 5.43E-06                  | 5.58E-06                  | 6.702E-07                 | 1.00E-05                  |    |                                         |
| TSA        | 7.00E-09                  | 1.76E-08                  | 2.80E-08                  | 1.05E-09                  | 6.60E-07                  |    |                                         |

\* These peptide samples had some impurities that could not be fully removed.

§ This peptide showed two peaks during purification that converted to each other (~1:1)

• Denotes folding into another structure with RMSD > 1.5 from designed model

C27 = homophenylalanine, Hpr = hydroxyproline, Nle = norleucine

ND = not determined



**Supplementary Table 3. IC<sub>50</sub> values for des1.1.0 and its variants for HDAC2 and HDAC6.** (Hpr = hydroxyproline). 2-Selectivity is fold potency for HDAC2 over HDAC6. Mutations are highlighted in cyan.

|          | Sequence                         | HDAC2 IC <sub>50</sub> | HDAC6 IC <sub>50</sub> | 2-Selectivity |
|----------|----------------------------------|------------------------|------------------------|---------------|
| des1.1.0 | SHA-Asn-Pro-Lys-Gln-dLys-Trp-Gly | 2.9 x 10 <sup>-7</sup> | 2.5 x 10 <sup>-8</sup> | 0.03          |
| des1.1.1 | SHA-Asn-Pro-Glu-Gln-dLys-Trp-Gly | 1.9 x 10 <sup>-7</sup> | 3.2 x 10 <sup>-8</sup> | 0.17          |
| des1.1.2 | SHA-Asn-Hpr-Lys-Gln-dLys-Trp-Gly | 9.3 x 10 <sup>-7</sup> | 2.2 x 10 <sup>-8</sup> | 0.02          |

**Supplementary Table 4. Initial values for HDAC2 IC<sub>50</sub> of designed macrocycles with different design methods.** All the peptides are N-to-C cyclized unless otherwise stated. 'd' before name of amino acids means they are in D chiral state.

| Peptide name             | peptide sequence                                        | MW   | HDAC2 activity |
|--------------------------|---------------------------------------------------------|------|----------------|
| SHA                      | SHA                                                     | 159  | 5 μM           |
| des1.1.0                 | SHA-Asn-Pro-Lys-Gln-dLys-Trp-Gly                        | 998  | 289 nM         |
| des1.1.0-linear          | Ac-SHA-Asn-Pro-Lys-Gln-dLys-Trp-Gly-NH2                 | 1016 | 1 μM           |
| des1.1.0-partial, linear | Ac-Gly-SHA-Asn-NH2                                      | 348  | 10 μM          |
| des1.1.1                 | SHA-Asn-Pro-Glu-Gln-dLys-Trp-Gly                        | 999  | 192 nM         |
| des1.1.2                 | SHA-Asn-Hpr-Lys-Gln-dLys-Trp-Gly                        | 1014 | 930 nM         |
| des1.1.3                 | SHA-Asn-Pro-Lys-Dap-dLys-Trp-Gly                        | 956  | 10-100 nM      |
| des1.1.4                 | SHA-Asn-Pro-Lys-Ser-dLys-Trp-Gly                        | 957  | 10-100 nM      |
| des1.1.5                 | SHA-Asn-Pro-Lys-Gln-dLys-Asn-Gly                        | 926  | 100 nM-1 μM    |
| des1.1.6                 | SHA-Asn-Pro-Lys-Gln-dLys-Thr-Gly                        | 913  | 100 nM-1 μM    |
| des1.2.0                 | SHA-dLys-dNle-Glu-dAsn-dThr-Arg-dAla                    | 972  | 100 μM         |
| des1.3.0                 | SHA-dAsn-dAsp-Glu-dAsn-dAsn-Arg-dAla                    | 973  | 1 μM           |
| des1.4.0                 | SHA-Leu-Val-dAsn-Orn-dAsp-dGlu-Ser-Pro-Pro-Asp-Arg-dAla | 1467 | 100 μM         |
| des2.1.0                 | SHA-Trp-dThr-Asp-Asn-dSer-dLys-dAsp-Lys                 | 1133 | 49.3 nM        |
| des2.1.1                 | SHA-Trp-dThr-Asp-Asn-dSer-dMet-dAsp-Lys                 | 1136 | 16.3 nM        |
| des2.2.0                 | SHA-Trp-dLeu-dSer-Gly-Gly-His-dVal-dTyr                 | 1059 | 100 nM-1 μM    |
| des2.2.1                 | SHA-Trp-dLeu-dSer-Gly-Gly-His-Thr-dTyr                  | 1061 | 100 nM-1 μM    |
| des2.2.2                 | SHA-Trp-dLeu-dSer-dPro-Gly-His-dThr-dTyr                | 1101 | 500 nM         |
| des2.3.0                 | SHA-Trp-Gly-Gly-Met-His-Gly-dTrp-dPhe                   | 1118 | 100 nM-1 μM    |
| des2.3.1                 | SHA-Trp-dPro-Gly-Met-His-dSer-dPhe                      | 1002 | 100 nM-1 μM    |
| des3.1.0                 | SHA-dHis-Ser-Pro-dArg-dGln-dPro-Tyr-Lys                 | 1153 | 1.4 μM         |
| des3.1.1                 | SHA-dHis-Ser-Pro-dArg-dGln-dPro-Trp-Lys                 | 1175 | 100 nM-1 μM    |
| des3.2.0                 | SHA-Tyr-dHis-dPro-dArg-Arg-Asp-dLys-C27                 | 1273 | 28 nM          |
| des3.2.1                 | SHA-Tyr-dHis-dPro-dArg-Arg-Asp-dPro-C27                 | 1243 | 66 nM          |
| des3.2.2                 | SHA-Tyr-dHis-dPro-dArg-Pro-Asp-dLys-C27                 | 1215 | 58 nM          |
| des3.2.3                 | SHA-Tyr-dHis-dPro-dArg-Pro-Asp-dPro-C27                 | 1184 | 92 nM          |
| des3.2.4                 | SHA-Tyr-dHis-dPro-dAsn-Lys-C27                          | 961  | 54 nM          |
| des3.2.5                 | SHA-Tyr-dHis-dPro-dArg-Lys-C27                          | 1001 | 95 nM          |
| des3.3.0                 | SHA-Tyr-dHis-dPro-dArg-Arg-Asp-dGln-C27                 | 1273 | 9.1 nM         |
| des3.3.1                 | SHA-Tyr-dHis-dPro-dArg-Arg-Asp-dSer-C27                 | 1231 | 25 nM          |
| des3.3.2                 | SHA-Tyr-dSer-dPro-dArg-Arg-Asp-dGln-C27                 | 1223 | 57 nM          |
| des3.4.0                 | SHA-Tyr-dAsn-dPro-dArg-Arg-Asp-dLys-C27                 | 1250 | 10-100 nM      |
| des3.5.0                 | SHA-dAla-Phe-dPro-Asp-dGln-Dap-dAsn-Dab                 | 1014 | >1 μM          |

|           |                                          |      |            |
|-----------|------------------------------------------|------|------------|
| des3.5.1  | SHA-dAla-Phe-Pro-dAsp-Asp-Ser-dAsn-Dab   | 1005 | >1 $\mu$ M |
| des3.6.0  | SHA-dHis-dAla-Tyr-dAsn-dAsn-Pro-dArg-Trp | 1198 | >1 $\mu$ M |
| des3.7.0  | SHA-Nlu-dSer-Trp-dSer-dAsp-Pro-Ala-C27   | 1076 | >1 $\mu$ M |
| des3.8.0  | SHA-dHis-dAsn-dGlu-Leu-dAla-Pro-Arg-B74  | 1174 | >1 $\mu$ M |
| des3.9.0  | SHA-Phe-Dap-dArg-dSer-dAla-Pro-Nlu-B74   | 1112 | 10-100 nM  |
| des3.10.0 | SHA-dArg-Ala-Pro-dLys-dGlu-dPhe-dArg-C27 | 1205 | 10-100 nM  |
| des4.1.0  | SHA-Trp-dSer-Asp-Trp-Arg-Gln             | 1017 | 100 nM     |
| des4.2.0  | SHA-Tyr-dGlu-dSer-Ser-dAsp-Arg-Val       | 995  | 200 nM     |
| des4.3.1  | SHA-Phe-dNle-Lys-dAla-dSer-Asp-dArg      | 977  | 350 nM     |

ncAAs used:

B74:beta-(2-naphthyl)-alanine  
C27:Homophenylalanine  
Dab:2,4-diaminobutyric acid  
Dap:2,3-diaminopropionic acid  
Hpr:Hydroxy Proline  
Nlu: Norleucine  
Nva:Norvaline  
Orn:Ornithine  
SHA: 2S-2-amino-7-sulfanylheptanoic acid

**Supplementary Table 5. IC<sub>50</sub> values for des3.2.0 and its variants for HDAC2 and HDAC6.** 2-Selectivity is defined as fold potency for HDAC2 over HDAC6. Mutations are highlighted in cyan.

|          | Sequence                                | HDAC2 IC <sub>50</sub> | HDAC6 IC <sub>50</sub> | 2-Selectivity |
|----------|-----------------------------------------|------------------------|------------------------|---------------|
| des3.2.0 | SHA-Tyr-dHis-dPro-dArg-Arg-Asp-dLys-C27 | 2.8 x 10 <sup>-8</sup> | 1.5 x 10 <sup>-8</sup> | 0.53          |
| des3.2.1 | SHA-Tyr-dHis-dPro-dArg-Arg-Asp-dPro-C27 | 6.6 x 10 <sup>-8</sup> | 2.9 x 10 <sup>-8</sup> | 0.44          |
| des3.2.2 | SHA-Tyr-dHis-dPro-dArg-Pro-Asp-dLys-C27 | 5.3 x 10 <sup>-8</sup> | 2.2 x 10 <sup>-8</sup> | 0.41          |
| des3.2.3 | SHA-Tyr-dHis-dPro-dArg-Pro-Asp-dPro-C27 | 4.0 x 10 <sup>-8</sup> | 1.9 x 10 <sup>-8</sup> | 0.47          |
| des3.2.4 | SHA-Tyr-dHis-dPro-dAsn-Lys-C27          | 6.8 x 10 <sup>-8</sup> | 2.9 x 10 <sup>-8</sup> | 0.43          |
| des3.2.5 | SHA-Tyr-dHis-dPro-dArg-Lys-C27          | 4.6 x 10 <sup>-8</sup> | 1.8 x 10 <sup>-8</sup> | 0.40          |

**Supplementary Table 6. IC<sub>50</sub> values for des4.3.1 and its variants for HDAC2 and HDAC6.** 6-Selectivity is defined as fold potency for HDAC6 over HDAC2. Mutations are highlighted in cyan.

|            | Sequence                            | HDAC2 IC <sub>50</sub> | HDAC6 IC <sub>50</sub> | 6-Selectivity |
|------------|-------------------------------------|------------------------|------------------------|---------------|
| des4.3.1   | SHA-Phe-dNle-Lys-dAla-dSer-Asp-dArg | 1.5 x 10 <sup>-6</sup> | 1.7 x 10 <sup>-8</sup> | 88.2          |
| des4.3.1.1 | SHA-Phe-dNle-Lys-dAla-dSer-Asp-dSer | 5.0 x 10 <sup>-6</sup> | 1.6 x 10 <sup>-7</sup> | 31.25         |
| des4.3.1.2 | SHA-Phe-dLys-Lys-dAla-dSer-Asp-dNle | NA                     | 5.4 x 10 <sup>-7</sup> | > 100         |
| des4.3.1.3 | SHA-Phe-dNle-Lys-dAla-dSer-Ala-dArg | 1.4 x 10 <sup>-6</sup> | 1.0 x 10 <sup>-8</sup> | 140           |

**Supplementary Table 7. Rosetta interface metrics analysis for crystal structure of des1.1.0 and des4.3.1.** We assume a relative error of 0.5 REU (Rosetta Energy Unit) for all calculations.

|                                   | <b>des1.1.0,<br/>model</b> | <b>des1.1.0,<br/>crystal-chain B</b> | <b>des4.3.1,<br/>crystal</b> |
|-----------------------------------|----------------------------|--------------------------------------|------------------------------|
| <b>ddg</b>                        | -11.1                      | -22.3                                | -17.0                        |
| <b>ddg_norepack</b>               | -20.9                      | -28.5                                | -21.2                        |
| <b>dsasa</b>                      | 0.4                        | 0.4                                  | 0.4                          |
| <b>interface_buried_sasa</b>      | 768.6                      | 825.4                                | 712.1                        |
| <b>interface_contactcount</b>     | 34.9                       | 41.6                                 | 24.9                         |
| <b>interface_hydrophobic_sasa</b> | 570.9                      | 589.5                                | 531.1                        |
| <b>interface_polar_sasa</b>       | 204.6                      | 237.1                                | 184.0                        |
| <b>Shape complementarity</b>      | 0.6                        | 0.8                                  | 0.7                          |

**Supplementary Table 8. Comparison of selective HDAC6 inhibitors in literature and des4.2.0.** Values are obtained from Selleckchem HDAC6 selective inhibitor catalog ([selleckchem.com](http://selleckchem.com)).

| <b>Compound</b>            | <b>IC<sub>50</sub> [nM]</b> | <b>selectivity</b>                                                                                                                           |
|----------------------------|-----------------------------|----------------------------------------------------------------------------------------------------------------------------------------------|
| CAY10603                   | 0.002                       | >200-fold selectivity over other HDACs.                                                                                                      |
| Tubacin                    | 4                           | approximately 350-fold selectivity over HDAC1.                                                                                               |
| Rocilinostat<br>(ACY-1215) | 4.7                         | >10-fold more selective for HDAC6 than HDAC1/2/3 (class I HDACs) with slight activity against HDAC8, minimal activity against HDAC4/5/7/9/11 |
| Nexturastat A              | 5                           | >190-fold selectivity over other HDACs                                                                                                       |
| Tubastatin A               | 15                          | selective (1000-fold more) against all other isozymes except HDAC8 (57-fold more).                                                           |
| HPOB                       | 56                          | HPOB is a potent, selective HDAC6 inhibitor with IC <sub>50</sub> of 56 nM, >30-fold selectivity over other HDACs.                           |
| <b>des4.2.0</b>            | 4.4                         | 80 fold selective for HDAC6 over HDAC8 and >10-fold selectivity for HDAC6 over HDACs1/2/3                                                    |



**Supplementary Table 9. NMR chemical shifts of design 2.1.1**

|       | H $\alpha$ | HN   | H $\beta$ | H $\gamma$ | H $\delta$ | H $\epsilon$ | Others:                                                                                                                        |
|-------|------------|------|-----------|------------|------------|--------------|--------------------------------------------------------------------------------------------------------------------------------|
| S_1   | 4.06       | 8.60 | 3.52      |            |            |              |                                                                                                                                |
| M_2   | 4.16       | 8.40 | 1.65,1.75 | 2.52,2.14  |            | 1.99         |                                                                                                                                |
| D_3   | 3.73       | 7.97 | 1.63,2.07 |            |            |              |                                                                                                                                |
| K_4   | 3.94       | 7.95 | 1.35      | 0.99       | 0.88       | 2.93         |                                                                                                                                |
| SHA_5 | 3.97       | 7.60 | 1.26      | 0.93       | 1.43       | 1.58         | H $\zeta$ :2.54                                                                                                                |
| W_6   | 4.40       | 8.05 | 2.89      |            |            |              | H $\epsilon$ 1:9.93<br>H $\epsilon$ 3:7.25,<br>H $\epsilon$ 2:7.14<br>H $\delta$ 1:6.82<br>H $\eta$ 2:6.90<br>H $\zeta$ 3:6.51 |
| T_7   | 4.41       | 7.51 | 3.63      | 0.17       |            |              |                                                                                                                                |
| D_8   | 4.30       | 8.10 | 2.42,2.53 |            |            |              |                                                                                                                                |
| N_9   | 4.37       | 8.22 | 2.41,2.54 |            |            |              | H $\delta$ 1:6.67<br>H $\delta$ 2:7.37                                                                                         |

**Supplementary Table 10. Crystallographic data<sup>a</sup>**

| Structures                             | des1.1.0<br>(HDAC2)<br>PDB ID: 6WHN                   | des1.1.1<br>(HDAC2)<br>PDB ID: 6WHO                   | des1.1.1'<br>(HDAC2)<br>PDB ID: 6WHQ                  | des1.1.2<br>(HDAC2)<br>PDB ID: 6WHZ                   | des2.1.1<br>(HDAC2)<br>PDB ID: 6WI3                   | des4.3.1<br>(HDAC6)<br>PDB ID: 6WSJ     |
|----------------------------------------|-------------------------------------------------------|-------------------------------------------------------|-------------------------------------------------------|-------------------------------------------------------|-------------------------------------------------------|-----------------------------------------|
| <b>Data collection</b>                 |                                                       |                                                       |                                                       |                                                       |                                                       |                                         |
| Space group                            | <i>P</i> 2 <sub>1</sub> 2 <sub>1</sub> 2 <sub>1</sub> | <i>P</i> 2 <sub>1</sub> 2 <sub>1</sub> 2 <sub>1</sub> | <i>P</i> 2 <sub>1</sub> 2 <sub>1</sub> 2 <sub>1</sub> | <i>P</i> 2 <sub>1</sub> 2 <sub>1</sub> 2 <sub>1</sub> | <i>P</i> 2 <sub>1</sub> 2 <sub>1</sub> 2 <sub>1</sub> | <i>P</i> 22 <sub>1</sub> 2 <sub>1</sub> |
| <i>a</i> , <i>b</i> , <i>c</i> (Å)     | 92.34, 97.66,<br>138.98                               | 92.54, 97.48,<br>138.97                               | 92.44, 97.30,<br>138.63                               | 92.47, 94.80,<br>138.81                               | 92.16, 97.59,<br>138.07                               | 51.5, 84.0, 94.4                        |
| $\alpha$ , $\beta$ , $\gamma$ (°)      | 90, 90, 90                                            | 90, 90, 90                                            | 90, 90, 90                                            | 90, 90, 90                                            | 90, 90, 90                                            | 90.0, 90.0, 90.0                        |
| <i>R</i> <sub>merge</sub> <sup>b</sup> | 0.098 (0.731)                                         | 0.178 (1.417)                                         | 0.185 (1.652)                                         | 0.290 (2.026)                                         | 0.227 (1.676)                                         | 0.126 (0.619)                           |
| <i>R</i> <sub>pim</sub> <sup>c</sup>   | 0.039 (0.309)                                         | 0.070 (0.583)                                         | 0.073 (0.647)                                         | 0.112 (0.792)                                         | 0.089 (0.656)                                         | 0.079 (0.413)                           |
| <i>I</i> / $\sigma$ ( <i>I</i> )       | 17.5 (1.7)                                            | 10.5 (1.4)                                            | 10.0 (1.2)                                            | 7.6 (1.1)                                             | 8.7 (1.2)                                             | 9.8 (3.8)                               |
| <i>CC</i> 1/2 <sup>d</sup>             | 0.987 (0.539)                                         | 0.995 (0.541)                                         | 0.996 (0.574)                                         | 0.991 (0.548)                                         | 0.993 (0.516)                                         | 0.994 (0.845)                           |
| Completeness (%)                       | 98.4 (89.6)                                           | 100 (100)                                             | 100 (100)                                             | 100 (100)                                             | 100 (100)                                             | 100 (100)                               |
| Redundancy                             | 7.0 (5.7)                                             | 7.3 (6.8)                                             | 7.4 (7.5)                                             | 7.3 (7.4)                                             | 7.4 (7.5)                                             | 6.4 (5.8)                               |
| <b>Refinement</b>                      |                                                       |                                                       |                                                       |                                                       |                                                       |                                         |
| Resolution (Å)                         | 43.82 -1.54<br>(1.68 - 1.54) <sup>a</sup>             | 48.74 - 2.20<br>(2.25 - 2.20)                         | 48.65 - 2.35<br>(2.42 - 2.35)                         | 47.90 - 2.90<br>(3.08 - 2.90)                         | 48.80 - 2.35<br>(2.42 - 2.35)                         | 62.76 - 1.70<br>(1.76 - 1.70)           |
| No. reflections                        | 183886                                                | 64445                                                 | 52747                                                 | 27684                                                 | 52926                                                 | 45672                                   |

|                                                             |                           |                           |                           |                           |                           |                           |
|-------------------------------------------------------------|---------------------------|---------------------------|---------------------------|---------------------------|---------------------------|---------------------------|
| $R_{\text{work}} / R_{\text{free}}$ (%) <sup>e</sup>        | 16.2 / 19.2 (26.2 / 29.7) | 18.4 / 22.0 (28.8 / 32.1) | 19.5 / 24.1 (31.3 / 35.5) | 22.7 / 28.1 (36.6 / 43.4) | 19.2 / 25.3 (29.2 / 37.0) | 15.4 / 17.5 (18.0 / 22.3) |
| <b>Number of atoms<sup>f</sup></b>                          |                           |                           |                           |                           |                           |                           |
| Protein                                                     | 10058                     | 9579                      | 9462                      | 8958                      | 9385                      | 3057                      |
| Ion /Ligand                                                 | 211                       | 210                       | 291                       | 186                       | 205                       | 79                        |
| Water                                                       | 84                        | 83                        | 82                        | 75                        | 84                        | 238                       |
| Ramachandran <sup>g</sup><br>Favored/allowed<br>Outlier (%) | 98.47/1.53<br>00.00       | 98.55/1.45<br>00.00       | 97.37/2.63<br>00.00       | 94.98/5.02<br>00.00       | 97.54/2.46<br>00.00       | 97.13/2.87<br>00.00       |
| <b>R.M.S. deviations</b>                                    |                           |                           |                           |                           |                           |                           |
| Bond lengths (Å)                                            | 0.012                     | 0.002                     | 0.002                     | 0.002                     | 0.001                     | 0.007                     |
| Bond angles (°)                                             | 1.2                       | 0.5                       | 0.5                       | 0.4                       | 0.5                       | 1.2                       |
| <b>B<sub>factors</sub> (Å<sup>2</sup>)<sup>g</sup></b>      |                           |                           |                           |                           |                           |                           |
| Protein                                                     | 23                        | 41                        | 51                        | 65                        | 46                        | 12                        |
| Ion /Ligand                                                 | 40                        | 54                        | 58                        | 73                        | 60                        | 16                        |
| Water                                                       | 35                        | 43                        | 49                        | 40                        | 43                        | 21                        |

1. Data were collected from one crystal per condition.

2. <sup>a</sup>Values in parentheses refer to the highest-resolution shell indicated. <sup>b</sup> $R_{\text{merge}} = \frac{\sum_{hkl} \sum_i |I_{i,hkl} - \langle I \rangle_{hkl}|}{\sum_{hkl} \sum_i I_{i,hkl}}$ , where  $\langle I \rangle_{hkl}$  is the average intensity calculated for reflection  $hkl$  from replicate measurements. <sup>c</sup> $R_{\text{p.i.m.}} = \frac{(\sum_{hkl} (1/(N-1))^{1/2} \sum_i |I_{i,hkl} - \langle I \rangle_{hkl}|)}{\sum_{hkl} \sum_i I_{i,hkl}}$ , where  $\langle I \rangle_{hkl}$  is the average intensity calculated for reflection  $hkl$  from replicate measurements and  $N$  is the number of reflections. <sup>d</sup>Pearson correlation coefficient between random half-datasets. <sup>e</sup> $R_{\text{work}} = \frac{\sum ||F_o| - |F_c||}{\sum |F_o|}$  for reflections contained in the working set.  $|F_o|$  and  $|F_c|$  are the observed and calculated structure factor amplitudes, respectively.  $R_{\text{free}}$  is calculated using the same expression for reflections contained in the test set held aside during refinement. <sup>f</sup>Per asymmetric unit. <sup>g</sup>Calculated with MolProbity.
